1 **Modelled impact of Tiny Targets on the distribution and abundance**  
2 **of riverine tsetse**

3

4 Short title: Modelled impact of Tiny Targets on tsetse

5

6 Glyn A Vale<sup>1,2\*</sup>, John W Hargrove<sup>1</sup>, Andrew Hope<sup>3</sup> & Steve J Torr<sup>3\*</sup>

7

8

9

10

11 <sup>1</sup>South African Centre for Epidemiological Modelling and Analysis, University of  
12 Stellenbosch, Stellenbosch, South Africa

13

14 <sup>2</sup>Natural Resources Institute, University of Greenwich, Chatham, United Kingdom

15

16 <sup>3</sup>Liverpool School of Tropical Medicine, Liverpool, Merseyside, United Kingdom

17

18 \*Corresponding Authors: Glyn A Vale, Steve J Torr

19 E-mails: [valeglyn@gmail.com](mailto:valeglyn@gmail.com)

20 [steve.torr@lstmed.ac.uk](mailto:steve.torr@lstmed.ac.uk)

21

22 **Abstract**

23

24 **Background**

25 The insecticide-treated baits known as Tiny Targets are one of the cheapest means of  
26 controlling riverine species of tsetse flies, the vectors of the trypanosomes that cause  
27 sleeping sickness in humans. Models of the efficacy of these targets deployed near rivers  
28 are potentially useful in planning control campaigns and highlighting the principals involved.

29

30 **Methods and principal findings**

31 We produced a simple non-seasonal model of the births, deaths, mobility and aging of  
32 tsetse, and we programmed it to simulate the impact of seven years of target use against the  
33 tsetse, *Glossina fuscipes fuscipes*, in the riverine habitats of NW Uganda. The model's  
34 outputs matched reality in showing that: (i) good control can be achieved despite the  
35 degradation of targets, (ii) local elimination of tsetse is impossible if invasion sources are not  
36 tackled, and (iii) with invasion and target degradation it is difficult to detect any effect of  
37 control on the age structure of the tsetse population.

38

39 **Conclusions**

40 Despite its simplifications, the model can assist planning and teaching, but allowance should  
41 be made for any complications due to seasonality and management challenges associated  
42 with greater scale.

43

44

## 45 **Author summary**

46 We produced a simple model of the population dynamics of the riverine tsetse fly,  
47 *Glossina fuscipes fuscipes*, to simulate the field results of controlling this insect for  
48 seven years using Tiny Targets, i.e., artificial insecticide-treated baits, in NW  
49 Uganda. The model is potentially useful in planning tsetse control and illustrating the  
50 principles involved. Thus, it confirmed that targets can give good control, even if the  
51 targets degrade so much that they need replacement after six months. It showed that  
52 reinvasion can limit severely the efficacy of control campaigns and mask the  
53 changes in the age structure of the population. We stress the need to consider the  
54 possibility of seasonal complications and problems of managing large scale  
55 operations.

56

57

58

59

## 60 Introduction

61 Tsetse flies (*Glossina* spp) transmit the subspecies of *Trypanosoma brucei* that cause  
62 human African trypanosomiasis (HAT), commonly called sleeping sickness. There are two  
63 forms of this disease. The most common form is Gambian HAT (gHAT), caused by *T. b.*  
64 *gambiense* transmitted by riverine species of tsetse. The rarer Rhodesian HAT (rHAT) is  
65 caused by *T. b. rhodesiense*, which is usually spread by savanna species of tsetse. The  
66 distribution and incidence of HAT is shrinking, due to case detection and treatment, coupled  
67 with vector control [1]. The WHO aims to eliminate the transmission of sleeping sickness  
68 across Africa by 2030 [2], and elimination as a public health problem has already been  
69 declared in Benin, Cote d'Ivoire, Equatorial Guinea, Rwanda, Togo, and Uganda [3].

70

71 For gHAT, the most common method of vector control is to deploy artificial insecticide-  
72 treated baits, known as Tiny Targets, in the riverine vegetation where the vectors  
73 concentrate [4-6]. The ability to restrict the deployments to such vegetation means that  
74 humans can often be protected by killing the flies in comparatively small areas. This  
75 contrasts with the fact that the usual savanna vectors of rHAT must be controlled evenly  
76 over very extensive areas. However, getting the best from the Tiny Targets in riverine  
77 situations involves balancing the various opposing considerations within each of the  
78 following two spheres.

79

80 First, riverine tsetse can have a mean net movement of ~300 m/day if the habitat is  
81 sufficiently extensive [7]. This high mobility is advantageous, from the point of view of tsetse  
82 control, in that it allows the flies to locate the stationary targets. However, it can also be  
83 disadvantageous in that it provides a stream of flies invading from uncontrolled areas  
84 nearby. Such invasion means that it is impossible to ensure complete elimination of tsetse  
85 unless the whole extent of the infested area is tackled, up to the natural limits to invasion.  
86 Some mitigation of this problem arises because controlling tsetse by only 60-90% can be  
87 sufficient to break the transmission cycle of gHAT and so eliminate the disease locally [8, 9].

88

89 Second, Tiny Targets are simple, relatively cheap [10-12], and highly effective provided the  
90 targets remain in place and remain effective. Unfortunately, some of the targets can be  
91 washed away by floods or destroyed by bushfires, and others can be stolen or damaged by  
92 people [5]. Moreover, the efficacy of the insecticide deposit degrades over several months  
93 [5]. Against these problems, the fact that a mere 60-90% control of tsetse can be adequate  
94 to stop disease transmission suggests that the target technology can tolerate substantial  
95 misuse.

96

97 Models that address the above considerations would assist the planning and management of  
98 control campaigns by predicting the level and distribution of tsetse control achieved by  
99 different ways of using targets. Moreover, by highlighting various aspects of population  
100 dynamics, models are useful aids to teaching and research planning. The most pertinent  
101 model in previous use is Tsetse Muse (TM) [13], but its spatial simulations are primarily one  
102 dimensional. Present work developed TM into a new, two-dimensional model, termed Tsetse  
103 Plan 2 (TP2), that can deal with a wider range of operational areas, including those  
104 comprising a network of river lines. This new model was then employed to simulate and  
105 explain the field experience of the use of Tiny Targets to control the riverine tsetse, *G.*  
106 *fuscipes fuscipes*, in the focus of gHAT in NW Uganda [5].

107

108 Three aspects of the field experience were of particular interest. First, the impact of Tiny  
109 Targets was greater in the upstream sections of rivers and streams. Second, while the  
110 targets rapidly reduced the abundance of tsetse to low levels, they did not eliminate the  
111 population. Third, the targets failed to produce a noticeable reduction in the mean age of the  
112 population. We hypothesized that these phenomena were consequences of the natural  
113 movement of tsetse, perhaps coupled with variation in the abundance of tsetse habitat along  
114 the riverbanks. We also wanted to assess how much the loss and degradation of targets  
115 could explain the incomplete control of tsetse. Finally, in anticipation of the scaling-back of  
116 tsetse control as gHAT is eliminated, we used the model to assess the rate and extent to  
117 which tsetse populations would recover following the cessation of vector control. In all the  
118 above modelling there was the problem that the values of many of the necessary input  
119 parameters were unreliably quantified, so we explored the effects of a range of values.

120

## 121 **Methods**

### 122 **Model structure**

123 The model is downloadable for inspection and use at [https://sourceforge.net/projects/tsetse-](https://sourceforge.net/projects/tsetse-plan-2/)  
124 [plan-2/](https://sourceforge.net/projects/tsetse-plan-2/) and is merely outlined here. It was produced in spreadsheets of Microsoft Excel and  
125 was operated via Visual Basic for Applications. The spreadsheets represented lifetables with  
126 compartments for each daily age class of adult male and female tsetse and pupae. Each  
127 compartment took the form of a map, comprising a block of 70 x 70 cells, each representing  
128 1 x 1 km of territory, so that the whole map covered 70 x 70 km. Numbers in each cell of the  
129 map indicated the distribution of the age class to which the compartment referred. The  
130 central 50 x 50 cells of the map were intended to portray the block of roughly 50 x 50 km  
131 studied by Hope et al. in NW Uganda [5]. The band of cells surrounding the central block

132 represented the potential invasion sources, comprising the nearby parts of Uganda to the  
133 North, East and South, and the adjacent part of the Democratic Republic of Congo (DRC) to  
134 the West. The border area between the countries comprises a N-S watershed with relatively  
135 sparse vegetation. On the Ugandan side of the watershed the rivers drain East to the Nile.  
136 On the side of the DRC the rivers go West to the Atlantic.

137

138 Detailed portrayal of the varied vegetation of the mapped area was beyond the scope of  
139 present work. Hence, the vegetation map was produced by combining just four types of cell,  
140 regarded as being traversed by: (1) a large river, (2) medium river, (3) small river, and (4) no  
141 river, i.e., an interfluvium. Unless stated otherwise, the percent of each sort of cell that was  
142 covered by good habitat was 10%, 7%, 4% and 1%, respectively, and for cells with a river  
143 the habitat was considered to occur along the river. For example, the 10% of habitat cover in  
144 cells with a large river would involve bands of habitat averaging 50m wide along each bank,  
145 assuming that the river ran straight through the cell. Within those cells that contained a river,  
146 the vegetation away from the riverine habitat was regarded as the same as in the interfluvium.  
147 Figure 1A shows the adopted arrangement of the vegetation types, based on a schematic  
148 representation of the actual river systems in the study area. It was taken that small rivers  
149 must traverse seven cells before becoming a medium river, which must then traverse 21  
150 more cells before becoming a large river. Interfluviums were typically two cells wide, but wider  
151 on the main watershed.

152

### 153 **Natural carrying capacities and death rates**

154 The habitat associated with the large rivers was regarded as the most favourable, having a  
155 standard, natural, carrying capacity (SNCC) per km<sup>2</sup> of 5000 adult females and 2500 adult  
156 males if there was no net invasion or emigration of flies. Given that the habitat forms only  
157 10% of the area of cells with a large river, the standard population in a cell with a large river  
158 was 500 females and 250 males. The adopted set of parameter values needed to stabilise  
159 the population at that level is shown in SI Table. These parameters were based as far as  
160 possible on published data, with the compatible level of natural adult mortality being found  
161 by Excel's Goal Seek facility. The habitats of other rivers and interfluviums were made less  
162 favourable by increasing the death rates of adults and pupae. Unless stated otherwise, each  
163 of these death rates at SNCC was increased by factors of 1.05, 1.10 and 1.20 for the  
164 medium rivers, small rivers and interfluviums, respectively. This meant that in the absence of  
165 control and any net movement, and allowing for habitat cover, the natural carrying capacities  
166 for cells with a medium river, small river, or interfluvium were 92, 13 and 0 males, and 184, 25  
167 and 0 females per cell, respectively. However, during the simulations the numbers of tsetse  
168 in cells with relatively poor habitat could be increased a little if those cells were next to cells

169 with better habitat and hence relatively many flies, which formed an invasion source. Hence,  
170 in heterogeneous terrain there were never zero flies in the interfluve cells.

171

172 All of the above population numbers are arbitrary, since no data are available for the true  
173 density of tsetse in NW Uganda. However, while the absolute numbers adopted by the  
174 simulations are suspect, it is pertinent to focus on their relative values. This means, for  
175 example, that the location of the concentration points of the tsetse population, and the  
176 percents of population control, are unaffected.

177

178 The natural death rates of adults and pupae in any habitat type were made density  
179 dependent, based on the formula:

$$180 \quad m_d = m_s((1 - k) + kd/s)$$

181 where:

182  $s$  is the density at the SNCC

183  $d$  is the current density per km<sup>2</sup>

184  $m_s$  is the natural death rate for any given sex and age class in the given habitat type,  
185 when the density in that habitat is at the SNCC;

186  $m_d$  is the natural death rate for any given sex and age class in the given habitat type,  
187 when the density in that habitat is  $d$

188  $k$  is an input constant.

189

190 Unless stated otherwise,  $k$  was set at 0.1, meaning that when the current density declined  
191 from SNCC to zero, the death rate declined by a factor of 0.9. Density was always  
192 expressed as the total males plus females per km<sup>2</sup> when dealing with the death rates of  
193 either male or female adults, and as the total pupae of both sexes per km<sup>2</sup> when dealing with  
194 pupal mortality. For convenience, the death rates of immature stages, comprising eggs and  
195 larvae, were taken as zero in all habitats at all fly densities, since the actual death rates of  
196 these life stages seem <1% per reproductive cycle of 10 days [14].

197

### 198 **Fly mobility**

199 Daily diffusive movement was simulated by transferring flies between orthogonally adjacent  
200 cells, it being considered that before and after the transfer all flies occurred at the centres of  
201 the cells they occupied. Unfortunately, while this sort of orthogonal movement is convenient  
202 and manageable to model, it is imperfect in the following two respects. First, it was  
203 impossible for the modelled flies to transfer to a diagonally adjacent cell in one day, although  
204 they could get there after two days of movement. However, that would mean that to get to a  
205 diagonally adjacent riverine cell the flies would have to go through an interfluve cell. Thus, to

206 ensure that flies in a riverine cell could transfer directly to adjacent riverine cells in a single  
207 day, all riverine cells had to be connected to each other orthogonally in the model's map,  
208 implying that all rivers had to flow either parallel or at right-angles to each other (Fig. 1A).  
209 Second, since we use cells of side 1km and a pattern of daily orthogonal movement which  
210 involves flies travelling only between the centres of orthogonally adjacent cells, the error in  
211 simulating various rates of diffusive movement over many days can be great if cell  
212 evacuation rates are set to give the right average movement over just a few days. We  
213 minimised this problem by setting the rates of cell evacuation such that they produced the  
214 required average rate of daily diffusion assessed over 30 days.

215

216 In addition, there was the problem that the markedly heterogeneous vegetation in NW  
217 Uganda is believed to affect fly mobility. In allowing for this, it was imagined that when daily  
218 movement began, all flies in the cell, i.e., at its centre, started to move equally in all four  
219 orthogonal directions. Of the flies travelling in each direction, some reached the edge of the  
220 cell and transferred to the centre of the orthogonally adjacent cell there, whereas all other  
221 flies returned to the centre of the cell in which they started the day. It was taken that for the  
222 transfer of flies from cells with relatively extensive habitat to riverine cells with less habitat,  
223 the cell evacuation rate was reduced in proportion to the reduction in habitat abundance. For  
224 example, if the flies were moving from a cell containing a large river, with 10% habitat cover,  
225 to a medium river, with 7% cover, the normal evacuation rate from the large river was  
226 reduced by a factor of  $7/10 = 0.7$ . If the flies were about to transfer from a cell with a river to  
227 an interfluvial cell, then unless stated otherwise the evacuation rate was reduced by a factor  
228 of 0.01, implying that 99% of the flies that would have left to enter the interfluvial did not do  
229 so, but turned back to stay near the river. Flies on the point of transferring in the reverse  
230 direction, i.e., from an interfluvial to a cell with a river, or from a small to a larger river, never  
231 showed any reduction in evacuation rates, being assumed always ready to enter any  
232 relatively favourable habitat they encountered.

233

234 The computations of all the varied rates of cell evacuation involved in the above principles  
235 depended on first deciding on the daily rate of two-dimensional diffusive movement in a  
236 landscape conceived as composed entirely of the best habitat, i.e., with all cells covered  
237 completely by the sort of habitat normally found near the banks of a large river. Unless  
238 stated otherwise, it was taken that recently emerged females with poorly developed wing  
239 muscles [15] moved an average of 200m/day, increasing linearly to a maximum of 400m/day  
240 after 10 days as the muscles developed. Thereafter, the mobility remained steady. For  
241 males, which are known to be less mobile [16], the mobility in each age class was halved.



242 These levels of mobility are compatible with the field indications for the overall rate of  
243 dispersal of *G. f. fuscipes* in a large block of mostly favourable habitat in SE Uganda [7].

244

### 245 **Control by targets**

246 Unless stated otherwise, Tiny Targets were deployed only in cells that contained a river, and  
247 always at the rate of 20 per cell, corresponding roughly to the standard deployment rate  
248 adopted in Uganda, i.e., 20 per km of riverbank [5, 9]. Adopting the standard degree of  
249 habitat cover per cell, specified above, the number of targets per km<sup>2</sup> within the habitat of  
250 the cells with large, medium and small rivers was 200, 286, and 500, respectively. For  
251 special studies in which the habitat cover within the cells was varied away from the standard,  
252 the density of the targets was considered to change accordingly.

253

254 It was taken that Tiny Targets in good order, recently deployed at a density of one per km<sup>2</sup>,  
255 would produce a daily kill rate of 0.01% of the population of females of age one day. The  
256 rate rose linearly to be five times greater, i.e., to 0.05%, for females ten days old, and then  
257 remained at that rate for all older females. This rate was chosen since one large, odour-  
258 baited target kills around 2% of the population of *G. pallidipes* per day [17]. The greater size  
259 of such a target, combined with its odours, might be expected to make it around 40 times as  
260 effective as a Tiny Target for *G. f. fuscipes* [18-20]. It was taken that rates for males of any  
261 age were 80% of those for females of the same age. This schedule of mortalities for the  
262 sexes and age classes was termed "Schedule 0.05", being named in accord with its kill rate  
263 of 0.05% for female flies of age  $\geq 10$  days. Unless stated otherwise, Schedule 0.05 was  
264 adopted as the standard in all modelling. Other schedules were sometimes employed, each  
265 of which involved increasing or decreasing the rates for each sex and age by a set  
266 proportion, and each schedule was named according to its rate for the old females. For  
267 example, Schedule 0.01 involved the kill rate of 0.01% for such females.

268

269 Studies in Uganda indicated that many targets became damaged, stolen, or removed by  
270 floods, so that only around 20% remained after six months [5]. Moreover, it is expected that  
271 much of the insecticide deposited on the targets was weathered away in that time [9]. The  
272 combined effect of all of these processes was modelled as the "degradation rate", covering a  
273 first order decline in the killing power of targets. Unless stated otherwise, the degradation  
274 was at the standard rate of 1.5 % per day, which meant that the efficacy declined to only 6%  
275 of the initial level after six months. After that time, i.e., at the beginning of the 184<sup>th</sup> day after  
276 previous deployments, any of the old targets remaining were regarded as removed and a full  
277 set of 20 new targets was deployed per treated cell. Such six-month refreshments occurred  
278 regularly for as long as the target operation continued, in keeping with practices in Uganda

279 [5, 9]. Given that the target degradation in field situations was very variable [5], simulations  
280 were performed with a range of degradation rates.

281

## 282 **Simulation procedure**

283 For simulation of control, Excel was put into iterative mode with each iteration being taken as  
284 covering one day. The calculations of each iteration started at the top of the spreadsheet  
285 and travelled in a wave down the sheet and through the lifetables. The first action in the  
286 wave was to advance the date by one day, followed by moving the flies up one compartment  
287 of the tables, that is to a compartment for flies a day older. During that transfer the flies were  
288 subject to natural mortality and movement, and then to the control mortality due to targets.  
289 Finally, female tsetse dropped the day's crop of larvae, which promptly pupated, and pupae  
290 that had completed their development produced new adults.

291

292 The first set of simulations was aimed at getting appropriate values for those input  
293 parameters that are the most difficult to quantify from published sources. Such work began  
294 by considering the control produced by a range of mortality rates imposed by Tiny Targets  
295 that degraded at various rates and were operated in situations of homogeneous habitat with  
296 no net movement of the flies. It continued by testing the interplay of various levels of habitat  
297 cover, density dependence, fly movement, and target degradation in governing the  
298 distribution of tsetse in the schematic map of the heterogenous landscape in NW Uganda.  
299 For this the focus was primarily on the extent to which the simulations could reproduce the  
300 field effects of the one year of control operations performed in the small plots studied during  
301 Phase 1 of the work of Hope et al. [5] (Fig. 1B). It was appropriate to give special attention to  
302 those plots since they are the places subject to the most detailed study in the field [5, 9].  
303 Having produced seemingly credible simulations of the control achieved in Phase 1, further  
304 simulations were performed in succession to assess how well the model could represent the  
305 effects of the larger scale control performed during the succession of two-year periods  
306 forming Phases 2-5 of Hope et al. [5].

307

308 Before simulating the control, it was necessary to produce a map of the stable uncontrolled  
309 distribution of tsetse. Such maps were always created by seeding flies into all cells of the  
310 map and then running 10,000 iterations with no control, so that the numbers of flies in each  
311 cell adjusted to the combined effects of the mobility and natural mortality of tsetse, and  
312 habitat abundance, throughout the map. Figure 1B shows the distribution of the uncontrolled  
313 population arising from the standard set of input parameters. The age structure of the stable  
314 population is shown in S1 Figure

315

## 316 **Outputs**

317 The output of prime interest was the change in the simulated number of flies in the  
318 operational areas, because this can be expected to correlate with changes in trap catches,  
319 i.e., the main type of data available for validation from the field work and the main statistic by  
320 which the degree of tsetse control is usually judged [5, 6, 9, 21]. For simulations of tsetse  
321 abundance in representations of the actual operational area in NW Uganda, the numbers of  
322 male and female tsetse were usually pooled, and the extent of control was averaged over  
323 the six months (183 days) following the last refreshment of the targets. This type of statistic  
324 accords with the form of the empirical results reported for operations using Tiny Targets in  
325 NW Uganda [5]. In other simulations the male and female numbers were separated and  
326 often reported daily.

327

328 Records were also made of changes in the simulated age structure of the population since at  
329 some times and places the field work studied the ovarian age categories of females in the  
330 trap catches. Not surprisingly, control by targets reduces life expectancy and so decreases  
331 the proportion of older flies in the population [13, 22]. The complication here is that fly age  
332 affects the availability to stationary traps and targets, presumably because young flies are  
333 relatively immobile and so tend not to encounter such baits [15]]. As discussed above, it was  
334 assumed that the poorly mobile flies were <10 days old. Hence, to assist the interpretation of  
335 what overall trap catches mean about the density of the population, and to assess the overall  
336 kill rates imposed by targets, it was necessary to record the simulated daily percentage of  
337 the population that was aged  $\geq 10$  days. However, that statistic was of little use when  
338 validating the field data for the age structure of trap catches since virtually all the catches  
339 were in that age group. Hence, the modelling also simulated the percent of the population  
340 that was >40 days old. That age is of particular interest since the ovarian method used to  
341 age the field caught females in Uganda could not identify precisely the age of flies older than  
342 about that [23]. Lastly, given that a reduction in the proportion of older flies will decrease the  
343 percentage of flies of breeding age, modelling recorded the rate of pupal production.

344

## 345 **Results**

### 346 **Parameterisation**

347 *Effects of kill rates with targets always in good order.* To expose the basic abilities of targets  
348 to control tsetse in the absence of invasion, the model ran targets for a year in a landscape  
349 of effectively infinite extent, consisting only of cells with large rivers, and with no target  
350 degradation. The population data were produced for a cell at the centre of the map, i.e., a  
351 place where there could be no net invasion to offset the flies killed by the targets. These

352 simulations showed that an increase in the kill rates, from Schedule 0.01 through to  
353 Schedule 0.10, enhanced greatly the rate of population reduction in both sexes (Fig. 2AB).  
354 The rough rule of thumb is that, in the absence of invasion, the time taken to achieve any  
355 given level of control is inversely proportional to the kill rate. However, the degree of  
356 population decline with time was unsteady in the early stages, especially when the kill rate  
357 was high, because flies continued to emerge from pupae in a constant stream until a pupal  
358 period had been completed. That phenomenon had lasting repercussions, involving  
359 continued fluctuations in the percent of old flies in the population for several pupal periods,  
360 especially when kill rates were highest, i.e., with Schedule 0.10 (Fig. 2CD). However, such  
361 great fluctuations were largely theoretical since they occurred within a population that was so  
362 sparse as to be virtually extinct. The degree of population decline associated with Schedule  
363 0.05 seemed the most applicable to the field situation in NW Uganda, since it produced the  
364 maximum rate of decline evident there soon after target deployment, i.e., when target  
365 degradation and invasion were minimal [5]. While the selection of the appropriate kill  
366 schedule was the prime concern in the parameterisation of target efficacy, the changing age  
367 structure of the population caused two other points of interest to emerge, as below.

368  
369 First, the cyclic reductions in the proportion of flies  $\geq 10$  days old produced synchronised  
370 decreases in the percent of the total population killed per day (Fig. 2EF), because such old  
371 flies were the most available to targets. Consequently, the average percent of the total  
372 population killed per day, once control had started, was always less than the percentage on  
373 the first day of target deployment. For example, with Schedule 0.01 the kill rate for females  
374 on the first day of control, and the average daily kill rate for the rest of the year, was  
375 0.0091% and 0.0089% respectively. The corresponding figures were 0.0456% and 0.0393%  
376 for Schedule 0.05, and 0.0912% and 0.0692% for Schedule 0.10. That is, the difference  
377 between the kill rates on Day 1 and subsequent days was small when the kill rate on Day 1  
378 was low, but the difference increased as the Day 1 rate rose. Looked at another way, the  
379 general principle is that the difference between the kill rates on the first and subsequent days  
380 is negligible for campaigns in which the population declines to around 1% in a year, but  
381 starts to be much greater in operations involving population declines to about 0.0001% in a  
382 year. Allowing that this principle depends on the timings of the reproductive cycles, which  
383 are roughly the same for all tsetse species, it can be taken that the principle will apply to any  
384 of the species.

385  
386 Second, the breeding rate declined during control because only the older flies produce  
387 pupae and such flies become relatively scarce. For example, on the day before control  
388 began, the daily number of pupae produced per 1000 females was 77.8, but it dropped to an

389 average of 71.3 in the year of control associated with the modest kill rates of Schedule 0.01.  
390 The corresponding figures for the greater kill rates of Schedule 0.05 and Schedule 0.10 were  
391 much lower, being 46.6 and 26.0, respectively. The pertinent principle is that the efficacy of  
392 control by targets is not due simply to an increase in death rates, but also to a potentially  
393 drastic decline in birth rates, albeit that the change in pupal production has no instant impact  
394 on trap catches of adults.

395

396 *Effects of target degradation.* Using the map employed in previous work, consisting entirely  
397 of cells spanned by large rivers, targets were employed with the kill rates of Schedule 0.05  
398 on the first day, and with rates of target degradation ranging from 0.0 to 2.0% per day. As  
399 expected, the decline in tsetse numbers was relatively low for relatively high rates of  
400 degradation (Fig. 3AB). The results for the 1.5% degradation rate are most pertinent since  
401 that is roughly the rate at which the targets were observed to degrade in operations  
402 conducted in Uganda [5]. Moreover, modelling with that degradation rate simulated levels of  
403 population decline occurring at the time when degradation rates were assessed. The  
404 population decline involved was down to an average of around one percent of flies remaining  
405 during the second period of target redeployment, 6-12 months after control first started [5].

406

407 Not surprisingly, the percent of the population that was old declined sharply at the start of the  
408 target operation and immediately after the refreshment at six months. At those times there  
409 was little effect of the different rates of degradation since the degradation had by then had  
410 little time to become apparent. If there was no degradation of targets with time, the percent  
411 of old flies remained very low throughout the rest of the simulation period, there being only  
412 slight undulations while the relationship between births and deaths stabilised. For rates of  
413 degradation  $>0\%$ , the percent of old flies began to rise after about 50 days when the  
414 degradation was well under way, allowing the tsetse population to start increasing. With  
415 degradation rates of around 1.5% the percent of old flies was high for much of the six  
416 months after refreshment. Thus, even in the present subset of simulations, which were  
417 organized so that the percent of old flies could not be enhanced by invasion, the indications  
418 are that it could be difficult to notice a marked change in age structure averaged over many  
419 months.

420

421 *Exploring parameter values associated with Phase 1 of control.* All the simulations for this  
422 work employed the vegetation map intended to represent the various river systems and  
423 interfluvies in NW Uganda, with the targets deployed for one year in the five separate 7km-  
424 lengths of river treated in Phase 1 of Hope et al. [5] (Fig. 1B). In accord with the field work,  
425 the tsetse population was monitored in the cells of each treated length, together with the

426 groups of three cells representing the 3km of river upstream and downstream of each  
427 treated length. This meant that the monitoring was along 13km-lengths of river.  
428 Data produced using standard input values showed, in keeping with field observations [5],  
429 that the tsetse population was reduced by around 99% in the centre of the treated lengths of  
430 river (Fig. 4). The degree of control decreased towards the ends of the treated lengths, but  
431 control was evident in the 3km beyond the ends. Also, in keeping with field observations [5],  
432 the degree of control upstream was greater than downstream, i.e., the average percent of  
433 the tsetse population remaining in the six cells upstream of the central cell was 25.9%, as  
434 against 36.0% in the six downstream cells. Credible variations to the values of the  
435 parameters used in the simulations showed, as expected, that changes which directly or  
436 indirectly affected the natural death rates altered the natural abundance of tsetse by up to  
437 three-fold, but none of the changes produced any great alteration to the  
438 upstream/downstream distinction in the degree of control (S2 Table).

439

#### 440 **Simulations of population reduction in Phases 1 to 5**

441 Figure 5 shows the target treated rivers and the simulated average percent of the initial  
442 tsetse population remaining in the last six months of each of the five phases of operations in  
443 NW Uganda. The data for each phase are considered in turn, below.

444

445 *Phase 1.* Although monitoring was performed along all 13km of the seven riverine plots  
446 studied in Phase 1 (Fig. 1B), targets were deployed only in the central 7km of just five of  
447 these plots (Fig. 5, Phase 1). In accord with the field results, the remaining population was  
448 low along and near the riverine areas treated by targets. However, there was relatively little  
449 impact on the tsetse population in those untreated riverine areas, i.e., in the Koboko and  
450 Oluffe plots, that were not connected directly and closely to the target-treated rivers. The  
451 detailed outputs show that at Koboko, many kilometres away from any targets and on a  
452 separate river, the mean percent remaining along the monitored 13km was 100.0%,  
453 indicating no control. At Oluffe, which is only 3km away from treated rivers to the North and  
454 South, the percent remaining was reduced a little, to 98.2% (range 92.3-99.7) with the  
455 degree of reduction being greater on going downstream within the 13km, i.e., towards the  
456 nearby connected parts of rivers that had targets. Such small degrees of control are  
457 attributable to the tsetse diffusing away from the Oluffe plot and not being fully balanced by  
458 the potential invaders that had been killed in the target-treated areas several kilometres  
459 distant. Not surprisingly, and in keeping with the deliberate programming of the model, tsetse  
460 diffusing away from the Oluffe plot tended to move mostly down the river, rather than across  
461 the interfluvium.

462



463 Although the simulations of Phase 1 indicated that movement had little effect on catches  
464 when the immediate route of invasion was through interfluves, the situation was very  
465 different when the flies could move directly along rivers. For example, in the simulated  
466 Phase 1, there were seven target-treated cells covering the large river at Alivu (Fig. 1 B, Plot  
467 4). Each of these cells was connected to another riverine cell on at least two sides, so  
468 allowing strong movement. In the last six months of the phase the simulated percent of flies  
469 remaining in the treated cells averaged 16.2%, with a range of 10.3-26.9% among the  
470 individual cells. This average is 24 times greater than the 0.7% remaining in each of the  
471 seven cells when the same treatment system was used for a simulation in which no  
472 movement was allowed.

473

474 *Phase 2.* This phase involved expanding the target deployments a little, mostly towards the  
475 North and East, and was associated with a general improvement in the level of control. The  
476 Oluffe plot, which was untreated in Phase 1, and which registered poor control then, was  
477 treated in Phase 2 and showed a marked increase in the rate of control. Far to the North, the  
478 Koboko plot continued to show no control. The results in each plot accord with field data [5].

479

480 *Phase 3.* For this phase the target deployments were expanded much further North and  
481 East, so producing the most extensive deployments of any phase. The previously untreated  
482 river at Koboko in the far North was included in these deployments and, in keeping with field  
483 results, the population there declined markedly.

484

485 *Phase 4.* The overall extent of the target deployments was slightly reduced in this phase,  
486 due mainly to fewer placements in the North. However, this was partially offset by minor  
487 increases in deployments in the South-East and far West. The general level of control was  
488 not affected greatly by these changes in deployment, consistent with field results [5].

489

490 *Phase 5.* Anticipating a phased scaling back of tsetse control, we simulated the effect of  
491 halting the deployment of Tiny Targets in the West and South-West, in an area designated  
492 the invasion area (Fig. 5, Phase 5). The simulations indicated no marked re-bounce in the  
493 tsetse population in that area: the abundance of tsetse remained low, especially in the North-  
494 East of the invasion area where the target treatments were close on two of its sides.

495

### 496 **Spatial details of the abundance and age of flies in Phase 3**

497 Because Phase 3 involved the greatest treated area, it is pertinent to consider in detail the  
498 spatial aspects of the control it produced. However, the simple expedient of examining the  
499 population remaining along a straight transect through the treated area is inappropriate

500 because such a transect would pass through many interfluvial cells in which the population  
501 was very sparse even before any control. Hence, it is most pertinent to consider the  
502 population remaining along a single river, even if the river meanders a little from a straight  
503 transect through the operational area. The river selected, called the Chosen River, was that  
504 which has its source at Point A of Fig. 5 (Phase 5) and flows out of the treated area at Point  
505 B, before continuing in a roughly straight line to the eastern edge of the map.

506

507 *Effects on degree of control.* The salient outcome of the simulations along the Chosen River  
508 was the fact that the degree of control there was very high using the standard kill rates of  
509 Schedule 0.05 and the standard degradation rate of 1.5% per day. Thus, after completing  
510 the five years of Phases 1, 2 and 3 operated in sequence, virtually no flies remained in the  
511 middle sections of the treated part of the river, representing a 99.99999% control there (Fig.  
512 6A, Schedule 0.05 = Fig 6. B, 1.5% degradation). In contrast, the actual levels of control  
513 achieved in the field campaign were of the order of only 99.0% [5]. Hence, while kill rates of  
514 Schedule 0.05 combined with the degradation rate of 1.5% had seemed to produce good  
515 simulations of the field results of Phase 1, such rates gave control that was up to five orders  
516 of magnitude too great in Phase 3. The implication seemed to be that by the time that Phase  
517 3 was reached in the field the kill rates could have declined and/or the degradation rate  
518 could have increased. To assess how much the rates might have altered, simulations were  
519 run in which the standard Schedule 0.05 and the 1.5% degradation were applied for the  
520 combination of Phases 1 and 2, followed by the changed rates for the whole of Phase 3.  
521 These changes involved keeping the degradation rate at the standard 1.5% and varying the  
522 kill schedule, or keeping to the standard kill schedule and varying the degradation. The  
523 results showed that to simulate the average field level of control of around 99%, the kill rates  
524 had to be reduced to about a third or the degradation rates had to be enhanced about three-  
525 fold (Fig. 6 A&B). Adopting the kill and degradation rates that gave realistic degrees of  
526 overall control, the percent control near the source of the river was around one order of  
527 magnitude greater than at the extreme downstream end of the treated section.

528

529 To emphasise that there appeared to be a substantial change in the dynamics of control  
530 between Phases 1 and 3, simulations of Phase 1 were rerun with the low kill rates or high  
531 degradation rates that were needed to account for the relatively low levels of field control at  
532 the end of Phase 3. Such simulations showed that the average percents of males plus  
533 females remaining in the target treated areas of Phase 1 were 53% and 35% for the kill rates  
534 of Schedules 0.01 and 0.02, respectively, and 38% and 43% for the degradation rates of  
535 4.5% and 5.5%, respectively (S3 Table). Thus, while low rates of kill and/or high rates of  
536 degradation were needed to simulate the field results of Phase 3, such rates adopted for



537 simulations of Phase 1 produced degrees of control that were one to two orders of  
538 magnitude poorer than the field results of Phase 1 [5]. The implication is that the basic  
539 efficacy of the target operation in Phase 1 was indeed substantially better than in Phase 3.

540

541 *Age and abundance of females.* Simulations along the Chosen River gave outputs for the  
542 number of females per km<sup>2</sup> of habitat (Fig. 6 C&D) and for the percent of the female  
543 population that was >40 days old (Fig. 6 E& F). The results indicated the theoretical principle  
544 that, in operations of the Ugandan type, the percent of old females could decline by around  
545 half, but only in places where the numbers of females per km<sup>2</sup> had reached such low levels  
546 that the likelihood of catching a fly for age studies would be virtually zero. The results also  
547 illustrate the principle that the percent of old females tends to be highest near the ends of the  
548 treated part of the river. This is because the population at the ends is maintained largely by  
549 invasion, and invaders tend to be old.

550

551 In general, the simulations showed that where the remaining females occurred at densities  
552 of  $\geq 1$ / km<sup>2</sup> of habitat, i.e., where there was at least a moderate chance of catching females  
553 for age studies, the percent of females that were >40 days old was high. For example, using  
554 the standard set of parameters to simulate Phase 3, thus giving the distribution of flies  
555 shown in Fig. 5 (Phase 3), only 83 of the target-treated cells satisfied the minimum criterion  
556 for female density. For these cells the mean percent of old females in the remaining  
557 population was 40% (range 36-44%). When the number of target-treated cells satisfying the  
558 minimum density requirement was increased to 443, by using the low kill rates of Schedule  
559 0.01, the mean percent of old females was 38% (36-44%). All of these percents differ little  
560 from the average of 43% (41-44%) on the whole map before control. Such small differences  
561 would be difficult to detect with confidence in the field, consistent with the fact that the field  
562 work in NW Uganda gave no evidence that the targets changed the age structure of the  
563 tsetse population [5].

564

## 565 **Discussion**

### 566 **Main practical concerns**

567 The model's outputs highlight some general principles that surround the three main points  
568 we wanted it to address in the field data [5], as follows.

569

- 570 1. *The targets failed to eliminate the tsetse population from the whole of the target*  
571 *treated areas.* This seemed due not so much to the degradation of targets, but rather  
572 the invasion of tsetse from neighbouring untreated areas.

573

574 2. *The degree of control upstream could be an order of magnitude greater than that*  
575 *achieved downstream.* The model suggested that several factors were responsible for  
576 this: (i) the invasion sources near the watershed were less well populated than those  
577 downstream, (ii) natural death rates were relatively high upstream, so that the  
578 population there had little density-dependent resilience, and (iii) suitable tsetse habitat  
579 was less abundant upstream, so that the density of targets per km<sup>2</sup> of habitat was  
580 relatively high, thus imposing a collectively greater death rate on the population.

581

582 3. *The age structure of the population was hardly affected in places where the traps had*  
583 *a fair chance of catching samples for study.* This was because the direct effect of the  
584 targets on reducing the abundance of old flies was evident mostly in the few weeks  
585 following the target deployment, after which the old flies could be replenished during  
586 several months of invasion and re-instated longevity.

587

588 Given the rough correspondence between the simulations and field experience, it seems that  
589 the model can be an aid to predicting the effects of various sorts of target campaigns and  
590 teaching the principles on which such campaigns depend. It is potentially important,  
591 therefore, that the model predicts that the tsetse population near the headwaters will not  
592 rapidly rebound to its initial level when the target operations are scaled back there. This is  
593 partly because the modelling, and field experience, show that the degree of control there  
594 tends to be high. It is also because the modelling allows that the habitat near the headwaters  
595 is relatively sparse and unfavourable.

596

### 597 **Caveats**

598 The model is simplistic in that it is non-seasonal, portrays the vegetation schematically,  
599 simulates diffusive movement in an orthogonal manner, envisages that target deployments  
600 take place all at once on a single day, and assumes that subsequent degradations of the  
601 targets occur evenly in time and space. Moreover, while the model's parameters for the  
602 timing of reproductive events, and for the general levels of mobility and natural death, must  
603 be roughly right [7, 9], the detail for the effects of vegetation on the death rates and  
604 movement are largely arbitrary. Given these limitations, there is need for caution in several  
605 respects, as below.

606

607 First, riverine tsetse in different operational areas are liable to have distinctive variations in  
608 their seasonal dynamics near the watersheds, especially since the rivers there tend to  
609 become dry at certain times of year. The importance of this is indicated by unpublished data

610 from the Ugandan work at Koboko (SI Text). Those data suggest that over the year the  
611 apparent density of tsetse near the watershed was on average about a quarter of that  
612 downstream. Moreover, the data also indicate that the seasonal variation in abundance  
613 became proportionally twice as great on nearing the watershed. Such phenomena imply that  
614 many of the flies upstream die off rapidly in the dry season, and /or that they migrate  
615 downstream then. This could explain why the field results showed that the control upstream  
616 of the target placements in Phase 1 was about 10-fold greater than downstream of the  
617 placements. Maybe the flies upstream moved down to the target-treated sections during the  
618 dry season and, being killed there, they could not return upstream in the wetter weather. In  
619 any event, it does seem that the failure of the present model to address seasonal issues  
620 could explain why the model's prediction for control near the watershed was less than  
621 observed at such places in the field.

622

623 Second, although for the most part the standard set of input parameters simulated realistic  
624 degrees of control in Phase 1, the same set produced simulated control that was several  
625 orders of magnitude too great by the end of Phase 3. While it must be allowed that the flies  
626 could have evolved immunity to insecticide [24], there is no evidence that such resistance  
627 has affected target operations elsewhere. Moreover, if resistance had occurred by Phase 3 it  
628 would be expected that two years later, by the end of Phase 4, the resistance would have  
629 become particularly widespread, ensuring levels of control much worse than those actually  
630 observed in Phase 4. It seems more likely that the problem involved a reduction in the basic  
631 efficacy of the target campaign itself, perhaps associated with challenges in management  
632 and supervision when the scale of operations increased. In any event, the field experience  
633 and the simulations indicate that any such reduction in target efficacy need not necessarily  
634 prevent the achievement of those levels of control required to interrupt transmission.

635 Moreover, in compensation for any drop in kill rates per target, or the greater loss of targets,  
636 it would help to reduce the normal field rate of target degradation [5]. That would ensure that  
637 fewer targets would be needed or that control would be quicker, so easing the demands on  
638 management.

639

640 Third, the present arbitrary inputs for the efficacy of a single target, that is the kill rates of the  
641 various schedules, make sense only by assuming that the main occupiable habitat extends  
642 no more than about 20-50m either side of the river. This accords with the common  
643 experience of trap catches being very poor at greater distances from riverbanks or lake  
644 shores with narrow bands of lush vegetation [4]. However, in some situations the lush  
645 vegetation might be much broader, as near Lake Victoria in SE Uganda [7, 25]. Furthermore,  
646 the variation in habitat geometry might affect the availability to stationary baits [26] but, in

647 any event, for places where the habitat is relatively broad it is likely that the number of  
648 targets per km of the riverbank or shoreline would have to be increased to maintain the  
649 abundance of targets per unit area of habitat.

650

### 651 **Theoretical considerations**

652 The fact that *G. f. fuscipes* appears not to move much through the interfluvies means that the  
653 population in the rivers is relatively isolated. This suggests that marked flies released by the  
654 river would be comparatively easy to recapture in operations limited primarily to upstream or  
655 downstream of the release points. Such mark-release-recapture (MRR) studies would  
656 provide valuable data for the death rates and mobility of tsetse in various parts of the river  
657 line. It would also allow estimates of population numbers. That would be useful in indicating  
658 the availability to the catching devices used for the MRR work. It would be especially  
659 informative in the present context if the catches from any killing device operated at the same  
660 time were related to the population density, thus helping the kill rates per bait to be  
661 established with greater confidence.

662

663 However, as present modelling shows, if kill rates per bait are evaluated like this they should  
664 be recognised as applying to the type and density of baits employed at the specific instant  
665 associated with the evaluation. This is because as control proceeds the age classes that are  
666 most readily killed by targets are the ones that decline most. However, the reduction in kill  
667 rate is no cause for practical concern, because it is the type of phenomenon that can  
668 become marked only when the kill rates are so high that the expected degree of decline in  
669 them is inconsequential. Moreover, while the change in age structure will reduce the kill rate,  
670 it will tend to compensate for that by also reducing the birth rate.

671

672 The known range of age-related issues, including the effect of age on mobility and natural  
673 deaths and births, makes it best to use models that allow for the age structure of the  
674 population. Hence the present model, TP2, is an improvement on its early predecessor,  
675 Tsetse Plan 1 [13], which relied entirely on a rule of thumb relationship between the imposed  
676 death rate and population decline. TP2 is also better than another predecessor, Tsetse  
677 Muse [15], because it is fully two-dimensional. Moreover, TP2 allows consideration of a  
678 wider range of modelling than discussed here. For example, it can be applied to savanna  
679 habitats and different sorts of control measures used alone or in combination. It can also be  
680 used with inputs allowing for variations in local climate, different types of host, changes in  
681 the abundance and availability of hosts, and alterations to the behaviour of tsetse during the  
682 hunger cycle. Readers are invited to use and improve the model themselves.

683

## 684 **Acknowledgements**

685 Funding for this research was provided by the Bill and Melinda Gates Foundation  
686 ([www.gatesfoundation.org](http://www.gatesfoundation.org)), with grants awarded to SJT (Grant ID#: OPP1104516, INV-  
687 001785) and AH (INV-046509), and the UK Biotechnology and Biological Sciences  
688 Research Council with grants awarded to SJT (BB/S01375X/1, BB/P005888/1,  
689 BB/L019035/1). SACEMA (GAV, JWH) receives core funding from the Department of  
690 Science and Innovation, Government of South Africa. The funders had no role in study  
691 design, data collection and analysis, decision to publish, or preparation of the manuscript.

692

## 693 **References**

- 694 1. WHO. Global Health Observatory data repository - Human African Trypanosomiasis  
695 [Internet] 2023 [cited 2023 19 April 2023]. Available from:  
696 <https://www.who.int/data/gho/data/themes/topics/human-african-trypanosomiasis>.
- 697 2. WHO. Ending the neglect to attain the Sustainable Development Goals: a road map for  
698 neglected tropical diseases 2021–2030. 196 p.
- 699 3. WHO. Global report on neglected tropical diseases 2023. 2023.
- 700 4. Stanton MC, Esterhuizen J, Tirados I, Betts H, Torr SJ. The development of high resolution  
701 maps of tsetse abundance to guide interventions against human African trypanosomiasis in northern  
702 Uganda. *Parasites & Vectors*. 2018;11. doi: 10.1186/s13071-018-2922-5. PubMed PMID:  
703 WOS:000434663800003.
- 704 5. Hope A, Mugenyi A, Esterhuizen J, Tirados I, Cunningham L, Garrod G, et al. Scaling up of  
705 tsetse control to eliminate Gambian sleeping sickness in northern Uganda. *PLoS Neglected Tropical*  
706 *Diseases*. 2022;16(6). doi: 10.1371/journal.pntd.0010222. PubMed PMID: WOS:000922612200005.
- 707 6. Tirados I, Hope A, Selby R, Mpembele F, Miaka EM, Boelaert M, et al. Impact of tiny targets  
708 on *Glossina fuscipes quanzensis*, the primary vector of human African trypanosomiasis in the  
709 Democratic Republic of the Congo. *PLoS Neglected Tropical Diseases*. 2020;14(10). doi:  
710 10.1371/journal.pntd.0008270. PubMed PMID: WOS:000581741700003.
- 711 7. Rogers D. Study of a natural population of *Glossina fuscipes fuscipes* Newstead and a model  
712 of fly movement. *Journal of Animal Ecology*. 1977;46(1):309-30. doi: 10.2307/3962. PubMed PMID:  
713 WOS:A1977CU67200020.
- 714 8. Rock KS, Torr SJ, Lumbala C, Keeling MJ. Predicting the Impact of Intervention Strategies for  
715 Sleeping Sickness in Two High-Endemicity Health Zones of the Democratic Republic of Congo. *PLoS*  
716 *Neglected Tropical Diseases*. 2017;11(1). doi: 10.1371/journal.pntd.0005162. PubMed PMID:  
717 WOS:000394152000010.
- 718 9. Tirados I, Esterhuizen J, Kovacic V, Mangwiro TNC, Vale GA, Hastings I, et al. Tsetse Control  
719 and Gambian Sleeping Sickness; Implications for Control Strategy. *PLoS Neglected Tropical Diseases*.  
720 2015;9(8):e0003822. doi: 10.1371/journal.pntd.0003822.
- 721 10. Shaw APM, Tirados I, Mangwiro CTN, Esterhuizen J, Lehane MJ, Torr SJ, et al. Costs Of Using  
722 "Tiny Targets" to Control *Glossina fuscipes fuscipes*, a Vector of Gambiense Sleeping Sickness in Arua  
723 District of Uganda. *PLoS Neglected Tropical Diseases*. 2015;9(3). doi: 10.1371/journal.pntd.0003624.  
724 PubMed PMID: WOS:000352199400082.

- 725 11. Rayaisse J-B, Courtin F, Mahamat MH, Cherif M, Yoni W, Gadjibet NMO, et al. Delivering 'tiny  
726 targets' in a remote region of southern Chad: a cost analysis of tsetse control in the Mandoul  
727 sleeping sickness focus. *Parasites & Vectors*. 2020;13(1). doi: 10.1186/s13071-020-04286-w.  
728 PubMed PMID: WOS:000562802700002.
- 729 12. Courtin F, Kaba D, Rayaisse J-B, Solano P, Torr SJ, Shaw APM. The cost of tsetse control using  
730 'Tiny Targets' in the sleeping sickness endemic forest area of Bonon in Cote d'Ivoire: Implications for  
731 comparing costs across different settings. *PLoS Neglected Tropical Diseases*. 2022;16(1):e0010033-e.  
732 doi: 10.1371/journal.pntd.0010033. PubMed PMID: MEDLINE:34986176.
- 733 13. Vale GA, Torr SJ. User-friendly models of the costs and efficacy of tsetse control: application  
734 to sterilizing and insecticidal techniques. *Medical and Veterinary Entomology*. 2005;19(3):293-305.  
735 PubMed PMID: ISI:000231510000008.
- 736 14. Hargrove JW. Improved estimates of abortion rates in tsetse (*Glossina* spp.). *Medical and*  
737 *Veterinary Entomology*. 2023;37(3):600-15. doi: <https://doi.org/10.1111/mve.12659>.
- 738 15. Hargrove JW. Some changes in flight apparatus of tsetse flies, *Glossina morsitans* and *G.*  
739 *pallidipes*, during maturation. *Journal of Insect Physiology*. 1975;21(8):1485-9. PubMed PMID:  
740 ISI:A1975AJ24900011.
- 741 16. Vale GA, Hursey BS, Hargrove JW, Torr SJ, Allsopp R. The use of small plots to study  
742 populations of tsetse (Diptera: Glossinidae) - difficulties associated with population dispersal. *Insect*  
743 *Science and Its Application*. 1984;5(5):403-10. PubMed PMID: ISI:A1984TZ39000014.
- 744 17. Hargrove JW. Tsetse eradication: sufficiency, necessity and desirability. Edinburgh: DFID  
745 Animal Health Programme; 2003. 133 p.
- 746 18. Omolo MO, Hassanali A, Mpiana S, Esterhuizen J, Lindh J, Lehane MJ, et al. Prospects for  
747 Developing Odour Baits To Control *Glossina fuscipes* spp., the Major Vector of Human African  
748 Trypanosomiasis. *PLoS Negl Trop Dis*. 2009;3(5). doi: 10.1371/journal.pntd.0000435. PubMed PMID:  
749 WOS:000267268000009.
- 750 19. Lindh JM, Torr SJ, Vale GA, Lehane MJ. Improving the Cost-Effectiveness of Artificial Visual  
751 Baits for Controlling the Tsetse Fly *Glossina fuscipes fuscipes*. *PLoS Negl Trop Dis*. 2009;3(7). doi:  
752 10.1371/journal.pntd.0000474. PubMed PMID: WOS:000268452200005.
- 753 20. Lindh JM, Goswami P, Blackburn RS, Arnold SEJ, Vale GA, Lehane MJ, et al. Optimizing the  
754 Colour and Fabric of Targets for the Control of the Tsetse Fly *Glossina fuscipes fuscipes*. *PLoS Negl*  
755 *Trop Dis*. 2012;6(5). doi: 10.1371/journal.pntd.0001661. PubMed PMID: WOS:000304758900039.
- 756 21. Mahamat MH, Peka M, Rayaisse J-B, Rock KS, Toko MA, Darnas J, et al. Adding tsetse control  
757 to medical activities contributes to decreasing transmission of sleeping sickness in the Mandoul  
758 focus (Chad). *PLoS Neglected Tropical Diseases*. 2017;11(7). doi: 10.1371/journal.pntd.0005792.  
759 PubMed PMID: WOS:000408057300086.
- 760 22. Vansickle J, Phelps RJ. Age distributions and reproductive status of declining and stationary  
761 populations of *Glossina pallidipes* Austen (Diptera: Glossinidae) in Zimbabwe *Bulletin of*  
762 *Entomological Research*. 1988;78(1):51-61. doi: 10.1017/S0007485300016060. PubMed PMID:  
763 WOS:A1988M431000005.
- 764 23. Saunders DS. Age determination for female tsetse flies and the age compositions of samples  
765 of *Glossina pallidipes* Aust., *G. palpalis fuscipes* Newst. and *G. brevipalpis* Newst. *Bulletin of*  
766 *Entomological Research*. 1962;53:575-95.
- 767 24. Maudlin I, Green CH, Barlow F. The potential for insecticide resistance in *Glossina* (Diptera:  
768 Glossinidae) - an investigation by computer simulation and chemical analysis *Bulletin of*  
769 *Entomological Research*. 1981;71(4):691-702. PubMed PMID: WOS:A1981MV85500018.



- 770 25. Albert M, Wardrop NA, Atkinson PM, Torr SJ, Welburn SC. Tsetse Fly (*G.f. fuscipes*)  
771 Distribution in the Lake Victoria Basin of Uganda. *PLoS Neglected Tropical Diseases*. 2015;9(4). doi:  
772 10.1371/journal.pntd.0003705. PubMed PMID: WOS:000354972200049.
- 773 26. Vale GA, Hargrove JW, Solano P, Courtin F, Rayaisse JB, Lehane MJ, et al. Explaining the host-  
774 finding behavior of blood-sucking insects: computerized simulation of the effects of habitat  
775 geometry on tsetse fly movement *PLoS Neglected Tropical Diseases*. 2014;8:e2901.
- 776
- 777

778

## Figure Captions

779

780 **Figure 1.** A: arrangement of the four habitat types in the model's simulation of the study area  
781 in NW Uganda. B: modelled distribution of male plus female tsetse resulting from the  
782 standard set of parameter values.

783 Tsetse abundance is shown as the number per cell expressed as a percent of the average  
784 abundance in all 4900 cells of the whole map. That average is 49.1.

785 **Figure 2.** Modelled percent of the initial numbers of male (A) and female (B) tsetse  
786 remaining after various days from the start of target operations associated with the various  
787 kill rates of Schedules 0.01 to 0.15, characterised by the daily kills of 0.01% to 0.15% per  
788 target per day among females  $\geq 10$  days old.

789 Also shown is the associated percent of the male (C) and female (D) population that is  $\geq 10$   
790 days old, and the percent of the male (E) and female (F) population killed per day, for all age  
791 classes combined. The targets were subject to no degradation and were deployed for one  
792 year in a model landscape consisting only of the best habitat, i.e., cells with a large river.

793 **Figure 3.** Modelled percent of the initial numbers of male (A) and female (B) tsetse  
794 remaining after various days from the start of target operations associated with rates of  
795 target degradation of 0.00% to 2.00% per day.

796 Also shown is the percent of the male (C) and female (D) population that is  $>40$  days old. On  
797 the first day of control the targets produced the kill rates of Schedule 0.05, associated with a  
798 kill per target per day of 0.05% among females  $\geq 10$  days old. The target campaign ran for  
799 one year in a model landscape consisting only of the best habitat, i.e., cells associated with  
800 a large river. Target deployments were refreshed after the first six months.

801 **Figure 4.** Simulated percent of the initial male plus female population remaining along each  
802 kilometre of the five 13-km lengths of river associated with target treatments in Phase 1 of  
803 the field work in NW Uganda. All parameters were at the standard values. T

804 he target campaign ran for one year with the targets being refreshed after six months. The  
805 percent remaining in each plot was assessed as the average of the daily percents in the last  
806 six months. Data for Ayi and Inve were so similar that the yellow plots for Inve totally obscure  
807 some of the plots for Ayi.

808 **Figure 5.** Distribution of targets and the average percent of the pre-control population of  
809 tsetse remaining during the last six months of control, in the simulations of the five phases  
810 of control associated with the field work of Hope et al. in NW Uganda [5].

811 Also shown are the numbers of cells with targets in the simulations, and the outputs for the  
812 average percent of tsetse remaining in the cells with targets. Areas identified in black font  
813 are mentioned in the text.

814 **Figure 6.** Data for the tsetse population along the Chosen River for the last six months of  
815 control in the simulations of Phase 3 of the field work of Hope et al. in NW Uganda [5].

816 The data cover the average percent of males plus females remaining (A,B), the average  
817 numbers of females per km<sup>2</sup> of habitat (C,D) and the average percent of females of age  $>40$   
818 days (EF). For A, C and E the degradation rate in the whole of Phase 3 was held at 1.5%  
819 while the target treatments involved kill schedules of 0.01 to 0.05. For B, C and F the kill  
820 schedule was fixed at 0.05 while the degradation rate varied from 1.5% to 5.5%. Each of the  
821 variants of control implemented in Phase 3 was preceded by the standard control in Phases  
822 1 and 2, comprising the kill schedule of 0.05 and 1.5% degradation. The graphs identified as  
823 "NC" refer to data before any control, i.e., prior to Phase 1. The plots start at the source of  
824 the river, near the main watershed, and go downstream in a predominantly eastward  
825 direction. Irregularities in the graphs correspond to points at which the size of the river



826 changes, or tributaries enter. Notice that the scale of the Y axis on E and F starts at 20%,  
827 not zero.

828

829

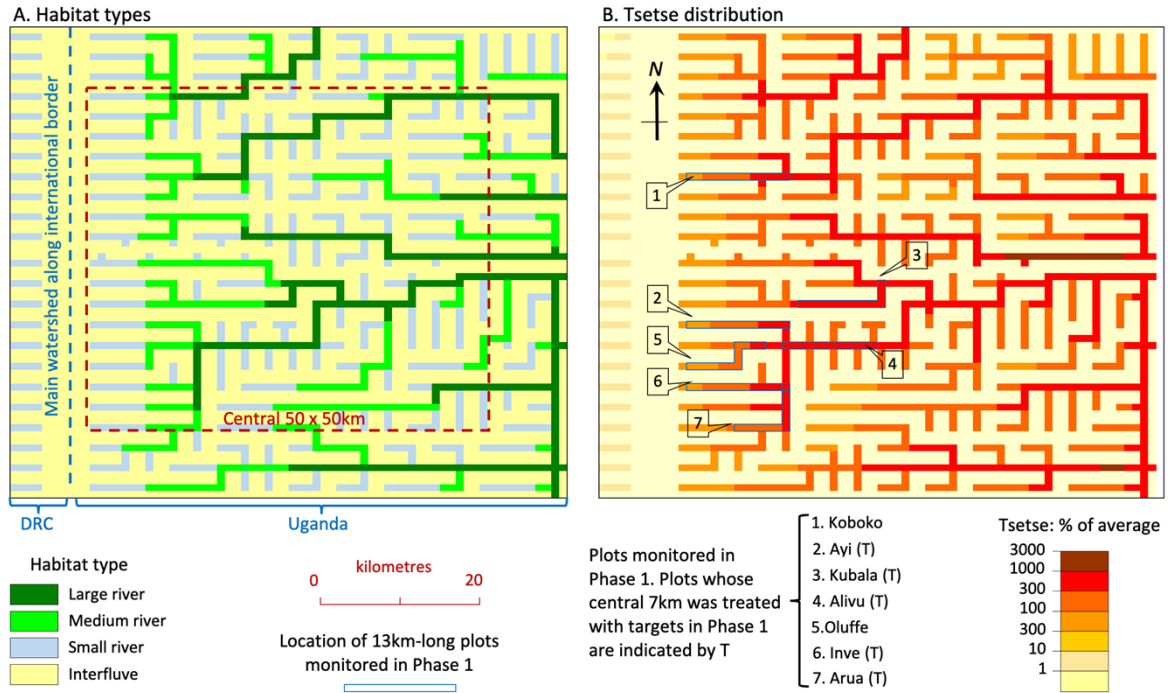

830

831 **Figure 1.** A: arrangement of the four habitat types in the model's simulation of the study area  
832 in NW Uganda. B: modelled distribution of male plus female tsetse resulting from the  
833 standard set of parameter values.

834 Tsetse abundance is shown as the number per cell expressed as a percent of the average  
835 abundance in all 4900 cells of the whole map. That average is 49.1.

836

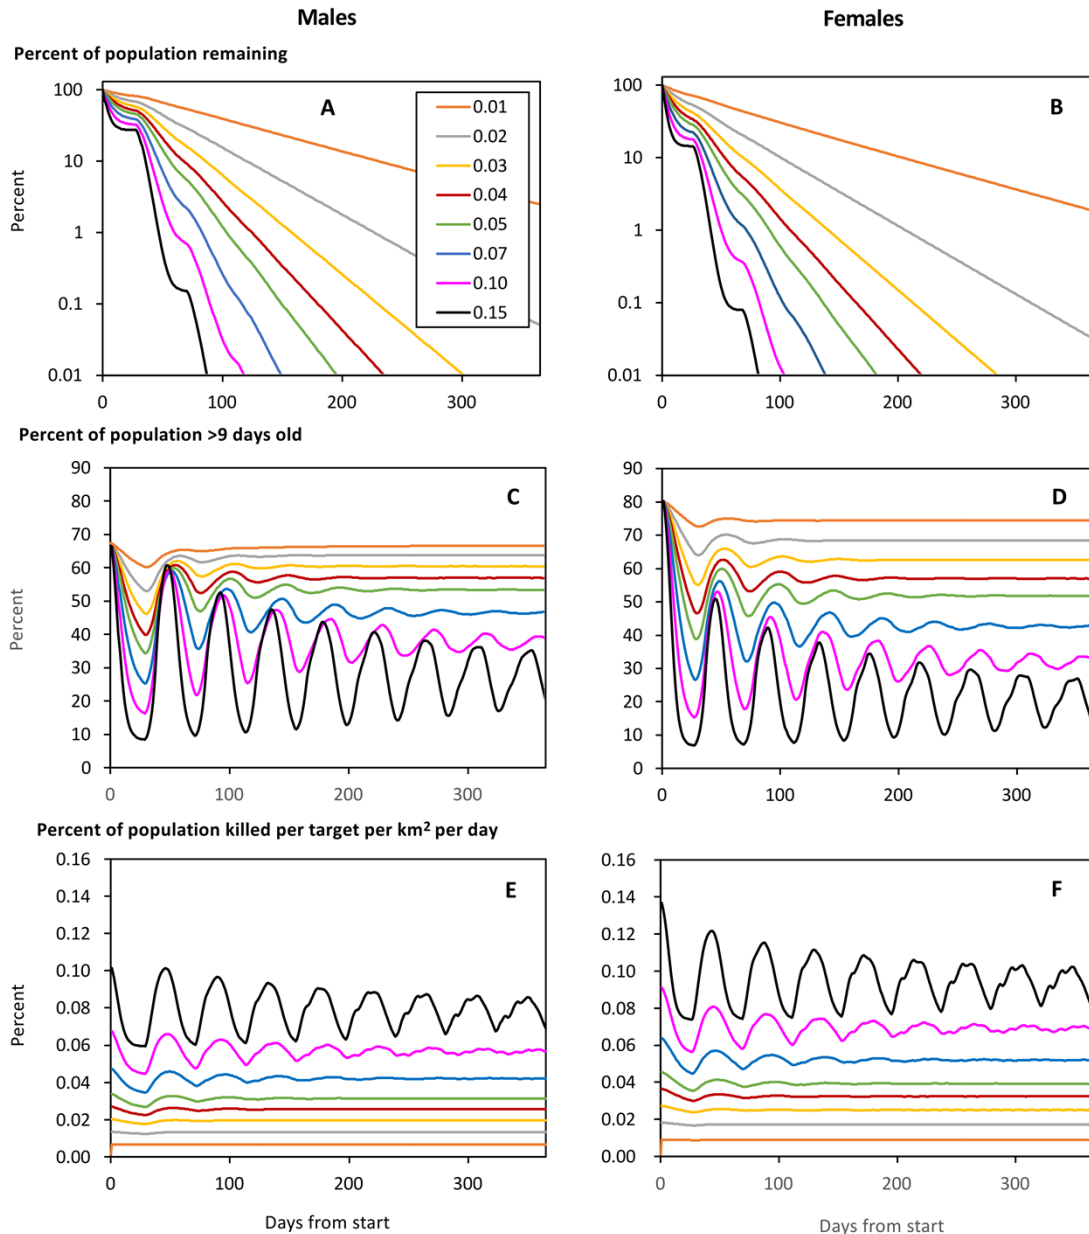

837

838 **Figure 2.** Modelled percent of the initial numbers of male (A) and female (B) tsetse  
839 remaining after various days from the start of target operations associated with the various  
840 kill rates of Schedules 0.01 to 0.15, characterised by the daily kills of 0.01% to 0.15% per  
841 target per day among females  $\geq 10$  days old.

842 Also shown is the associated percent of the male (C) and female (D) population that is  $\geq 10$   
843 days old, and the percent of the male (E) and female (F) population killed per day, for all age  
844 classes combined. The targets were subject to no degradation and were deployed for one  
845 year in a model landscape consisting only of the best habitat, i.e., cells with a large river.

846

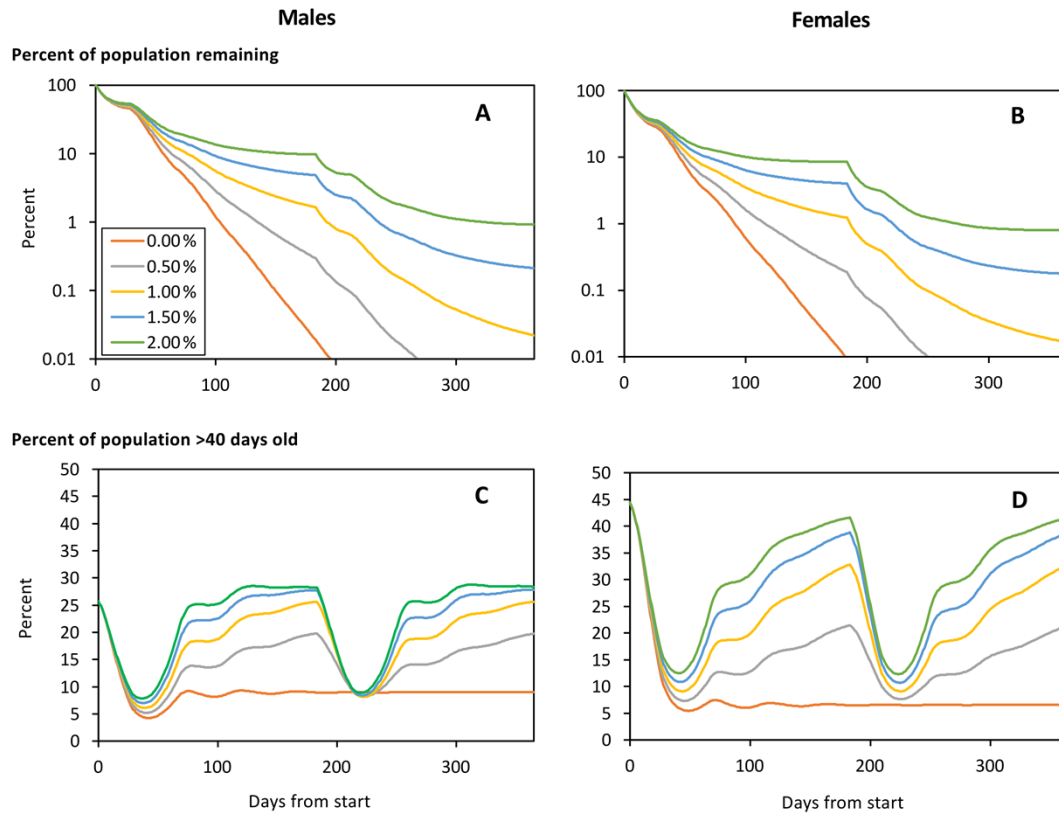

847

848 **Figure 3.** Modelled percent of the initial numbers of male (A) and female (B) tsetse  
849 remaining after various days from the start of target operations associated with rates of  
850 target degradation of 0.00% to 2.00% per day.

851 Also shown is the percent of the male (C) and female (D) population that is >40 days old. On  
852 the first day of control the targets produced the kill rates of Schedule 0.05, associated with a  
853 kill per target per day of 0.05% among females  $\geq 10$  days old. The target campaign ran for  
854 one year in a model landscape consisting only of the best habitat, i.e., cells associated with  
855 a large river. Target deployments were refreshed after the first six months.

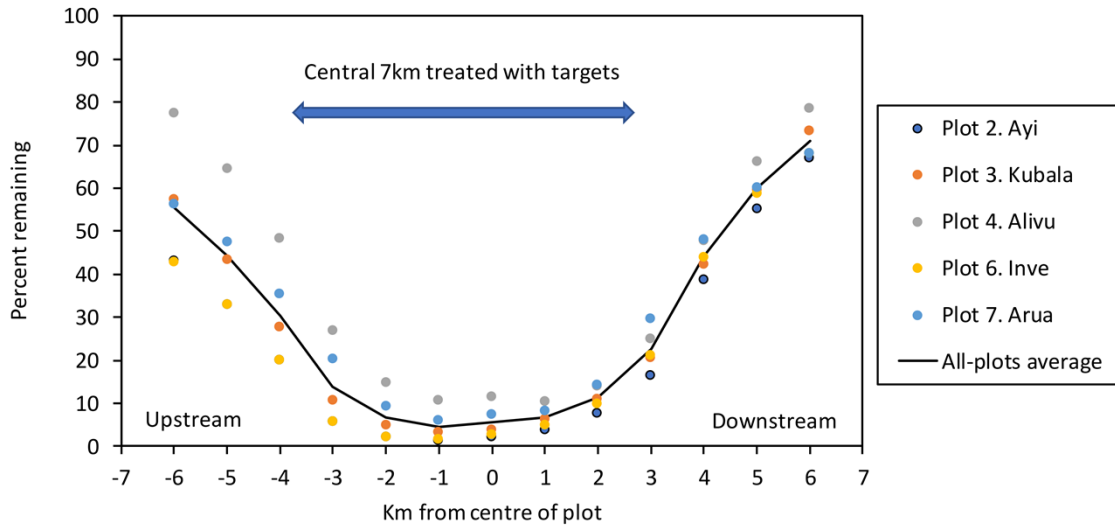

856

857 **Figure 4.** Simulated percent of the initial male plus female population remaining along each  
858 kilometre of the five 13-km lengths of river associated with target treatments in Phase 1 of  
859 the field work in NW Uganda. All parameters were at the standard values.

860 The target campaign ran for one year with the targets being refreshed after six months. The  
861 percent remaining in each plot was assessed as the average of the daily percents in the last  
862 six months. Data for Ayi and Inve were so similar that the yellow plots for Inve totally obscure  
863 some of the plots for Ayi.

864

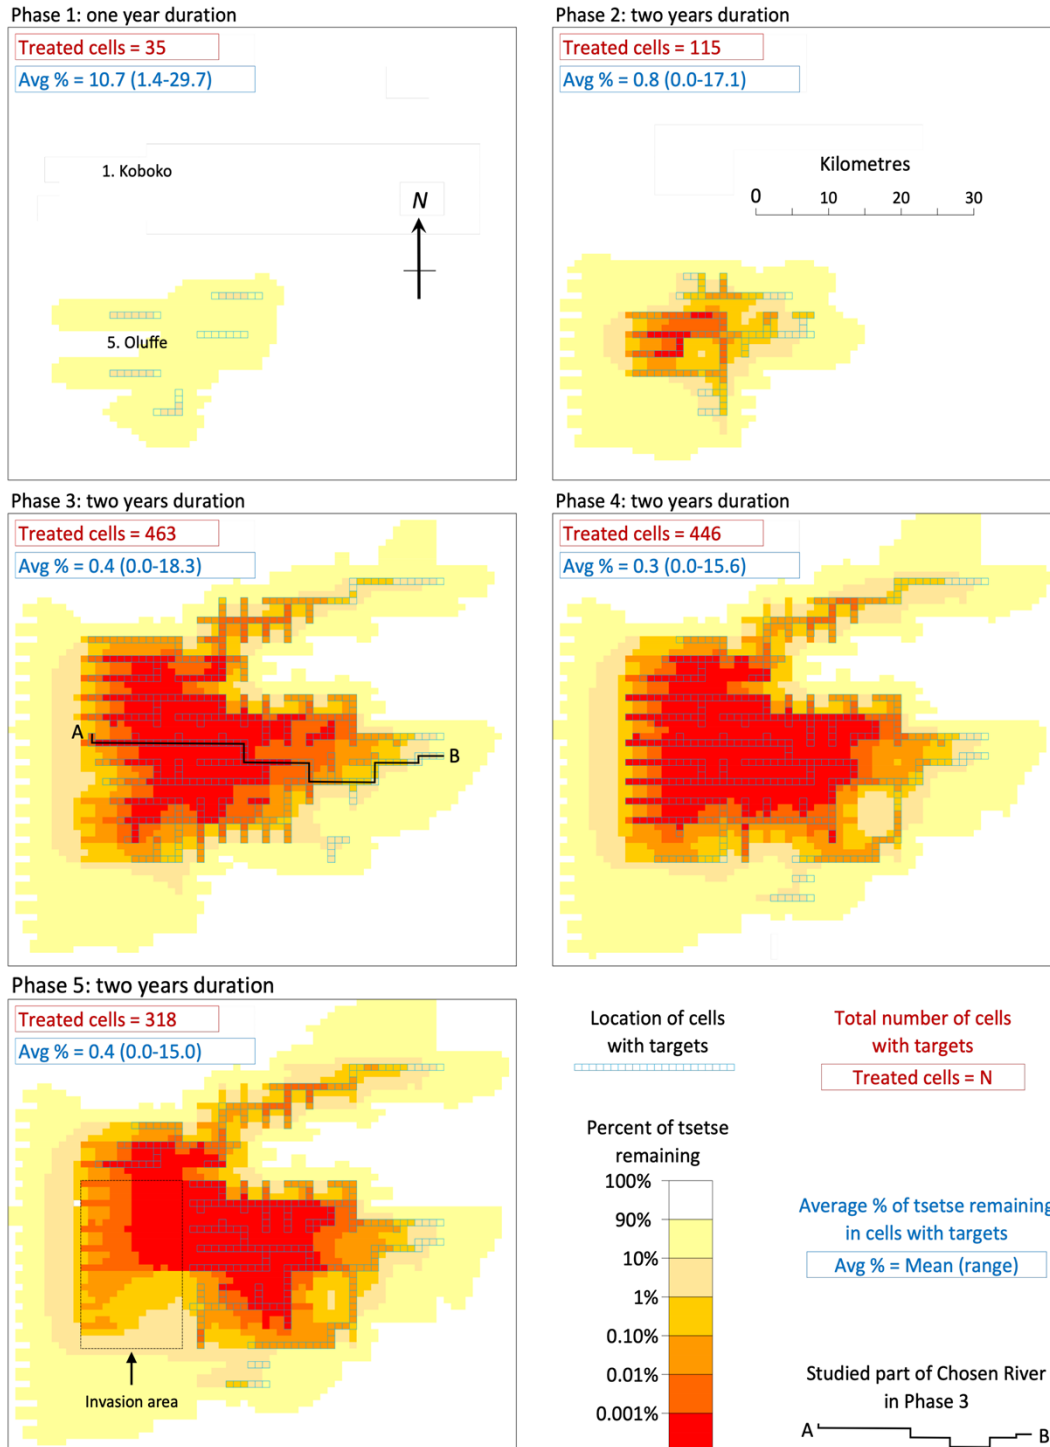

865

866 **Figure 5.** Distribution of targets and the average percent of the pre-control population of  
 867 tsetse remaining during the last six months of control, in the simulations of the five phases  
 868 of control associated with the field work of Hope et al. in NW Uganda [5].

869 Also shown are the numbers of cells with targets in the simulations, and the outputs for the  
 870 average percent of tsetse remaining in the cells with targets. Areas identified in black font  
 871 are mentioned in the text.

872

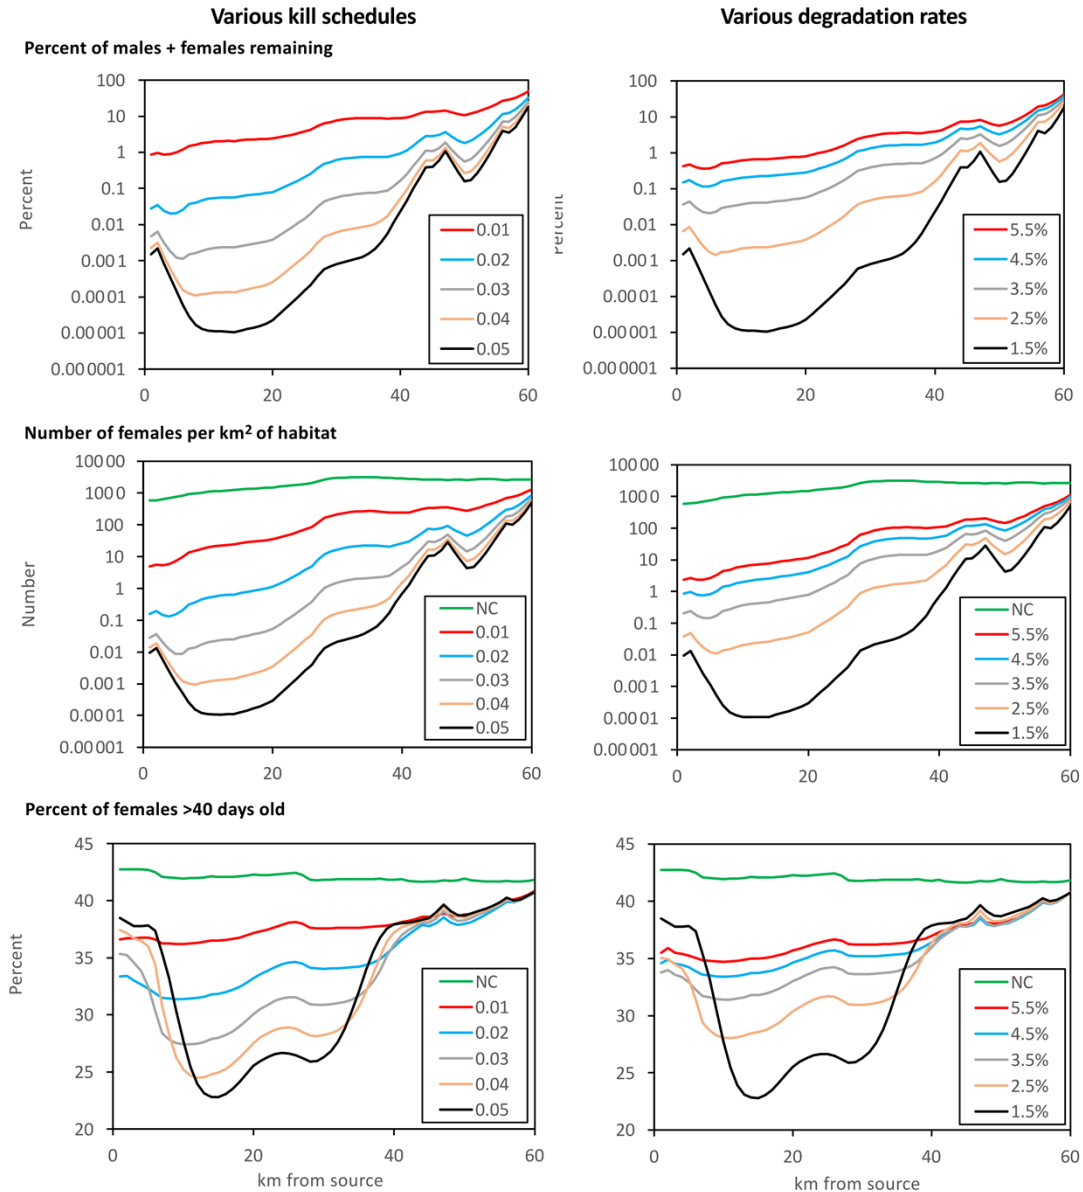

873

874 **Figure 6.** Data for the tsetse population along the Chosen River for the last six months of  
 875 control in the simulations of Phase 3 of the field work of Hope et al. in NW Uganda [5].

876 The data cover the average percent of males plus females remaining (A,B), the average  
 877 numbers of females per km<sup>2</sup> of habitat (C,D) and the average percent of females of age >40  
 878 days (E,F). For A, C and E the degradation rate in the whole of Phase 3 was held at 1.5%  
 879 while the target treatments involved kill schedules of 0.01 to 0.05. For B, C and F the kill  
 880 schedule was fixed at 0.05 while the degradation rate varied from 1.5% to 5.5%. Each of the  
 881 variants of control implemented in Phase 3 was preceded by the standard control in Phases  
 882 1 and 2, comprising the kill schedule of 0.05 and 1.5% degradation. The graphs identified as  
 883 "NC" refer to data before any control, i.e., prior to Phase 1. The plots start at the source of  
 884 the river, near the main watershed, and go downstream in a predominantly eastward  
 885 direction. Irregularities in the graphs correspond to points at which the size of the river  
 886 changes, or tributaries enter. Notice that the scale of the Y axis on E and F starts at 20%,  
 887 not zero.

888  
889  
890  
891  
892  
893  
894  
895  
896  
897  
898  
899  
900  
901  
902  
903  
904  
905  
906  
907  
908  
909

## Supporting Information Captions

**S1 Figure.** Numbers of tsetse per km<sup>2</sup> of habitat in various weeks of adult life, for a standard stable population of tsetse confined to the best habitat, i.e., beside a large river.

**S1 Table.** Data for the standard stable population of tsetse confined to the best habitat, i.e., beside a large river. The indicated timing of reproduction applies to tsetse in all habitats. Effects on death rates of adults and pupae in other habitats are detailed in the main text.

**S2 Table.** Initial stable population of male plus female tsetse per cell before any control in the five 13 km lengths of river studied in Phase 1, the average percentage of the initial population remaining in the last six months of control, and the average percent remaining in the upstream half of the 13 km length, expressed as a proportion of percent remaining in the downstream half, in a number of runs of the model involving increased or decreased values of one parameter in turn, in the context of standard values for all other parameters.

**S3 Table.** Simulated average percent of males plus females remaining in the last six months of control in the five 7km-long plots treated in Phase 1, when all of the standard parameters applied, except for a single change involving either the use of the low kill rates of Schedule 0.01 or 0.02, or the high degradation rates of 4.5% or 5.5% per day. Figures in parentheses indicate the range of the percents remaining along the individual 1km-long sections of the treated plots. The locations of the plots are indicated in Fig. 1B of the main part of the paper.

**SI Text.** Quantifying the changing abundance of tsetse along a river.

**S1 Original Data.** Catches of tsetse from traps located along the Kochi river, Koboko.
